# Supplementary material for: Optoacoustic imaging of GLP-1 Receptor with a near-infrared exendin-4 analog
Source: bioRxiv or medRxiv preprint supplement (doi:10.1101/2020.04.29.068619), 2020-04-30
Supplement: Supplementary file [file media-1.pdf]

## SUPPLEMENTARY INFORMATION FOR

### Optoacoustic imaging of GLP-1 Receptor with a near-infrared exendin-4 analog

Sheryl Roberts<sup>1</sup>, Eshita Khera<sup>2</sup>, Crystal Choi<sup>1</sup>, Tejas Navaratna<sup>2</sup>, Jan Grimm<sup>1,3,4,5</sup>, Greg M. Thurber<sup>2,6</sup>, Thomas Reiner<sup>1,4,7\*</sup>

<sup>1</sup> Department of Radiology, Memorial Sloan Kettering Cancer Center, New York, NY, 10065, USA

<sup>2</sup> Department of Chemical Engineering, University of Michigan, Ann Arbor, Michigan, United States

<sup>3</sup> Department of Molecular Pharmacology, Memorial Sloan Kettering Cancer Center, New York, New York, USA

<sup>4</sup> Department of Radiology, Weill Cornell Medical College, 1300 York Avenue, New York, New York.

<sup>5</sup> Pharmacology Program, Weill Cornell Medical College, 1300 York Avenue, New York, New York, 10065, USA

<sup>6</sup> Department of Biomedical Engineering, University of Michigan, Ann Arbor, Michigan, Unites States

<sup>7</sup> Chemical Biology Program, Memorial Sloan Kettering Cancer Center, New York, New York 10065

\* corresponding author: [reinert@mskcc.org](mailto:reinert@mskcc.org), +1-646-888-3461

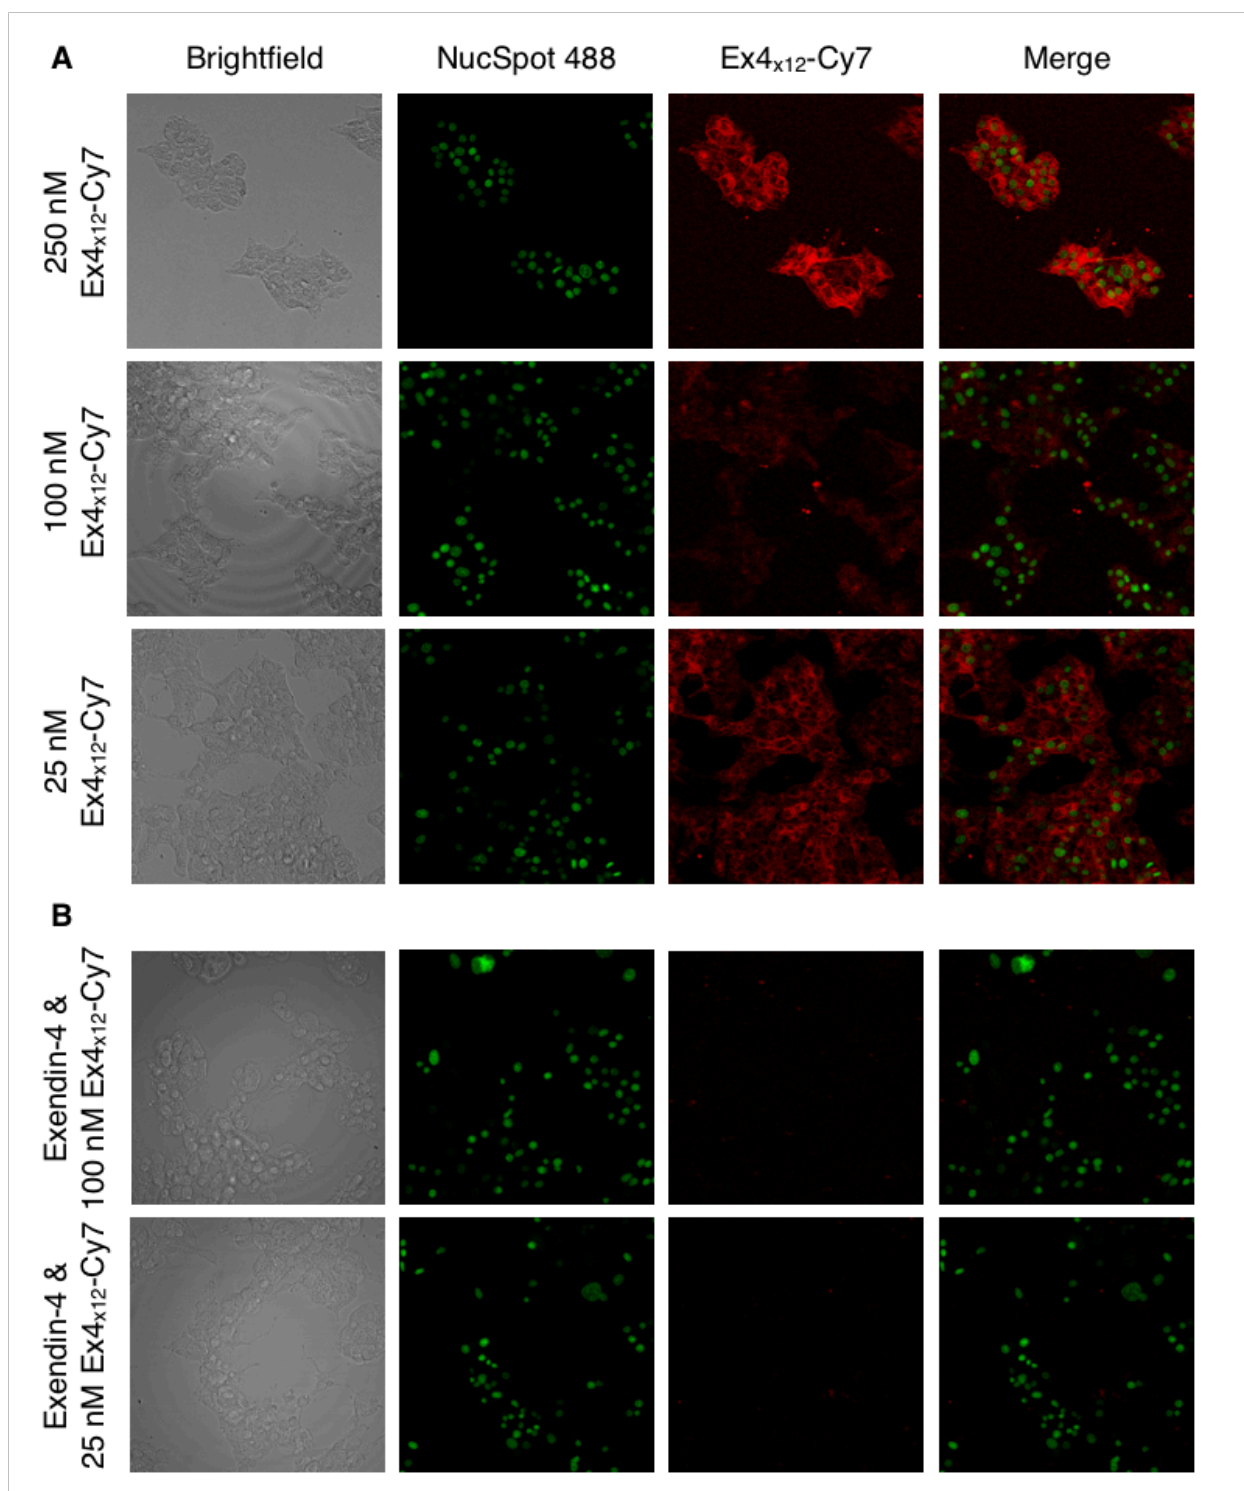

**Figure S1.** *In vitro* binding and inhibition studies. (A) Confocal microscopy imaging experiments using MIN6 cells following the addition of E4<sub>x12</sub>-Cy7 (red) at different concentrations: 250 nM (*top row*), 100 nM (*middle row*) and 25 nM (*bottom row*).

Columns from *left to right*: brightfield (1<sup>st</sup> column), nuclear staining with NucSpot 488 (green, 2<sup>nd</sup> column), E4<sub>x12</sub>-Cy7 staining (red, 3<sup>rd</sup> column) and the corresponding composite image (4<sup>th</sup> column). (B) Coincubation of E4<sub>x12</sub>-Cy7 at 100 nM (*top*) and 25 nM (*bottom*) with excess exendin-4.

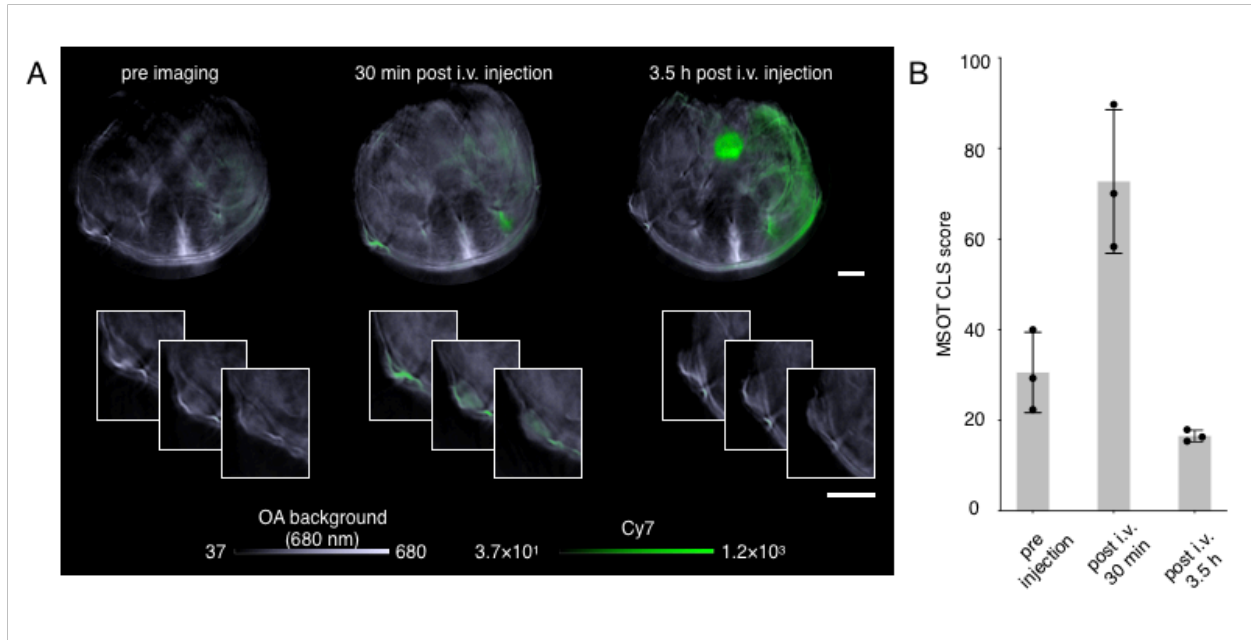

**Figure S2.** *In vivo* multi-spectral optoacoustic evaluation of E4<sub>x12</sub>-Cy7 at different timepoints. (A) Optoacoustic image reconstruction showing transverse 2D projection of mice at the region of interest before and 30 min after intravenous injection of E4<sub>x12</sub>-Cy7 (6.7 mg/kg) before (*left*), 30 min post-i.v. injection (*middle*) and 3.5 h post-i.v. injection (*right*). Overall optoacoustic signal at 680 nm (*greyscale*) is overlaid on top of multi-spectrally unmixed signals showing, E4<sub>x12</sub>-Cy7 channel (*green channel*). Both scale bars are 2.5 mm. (B) Optoacoustic signal quantification after multi-spectral unmixing.

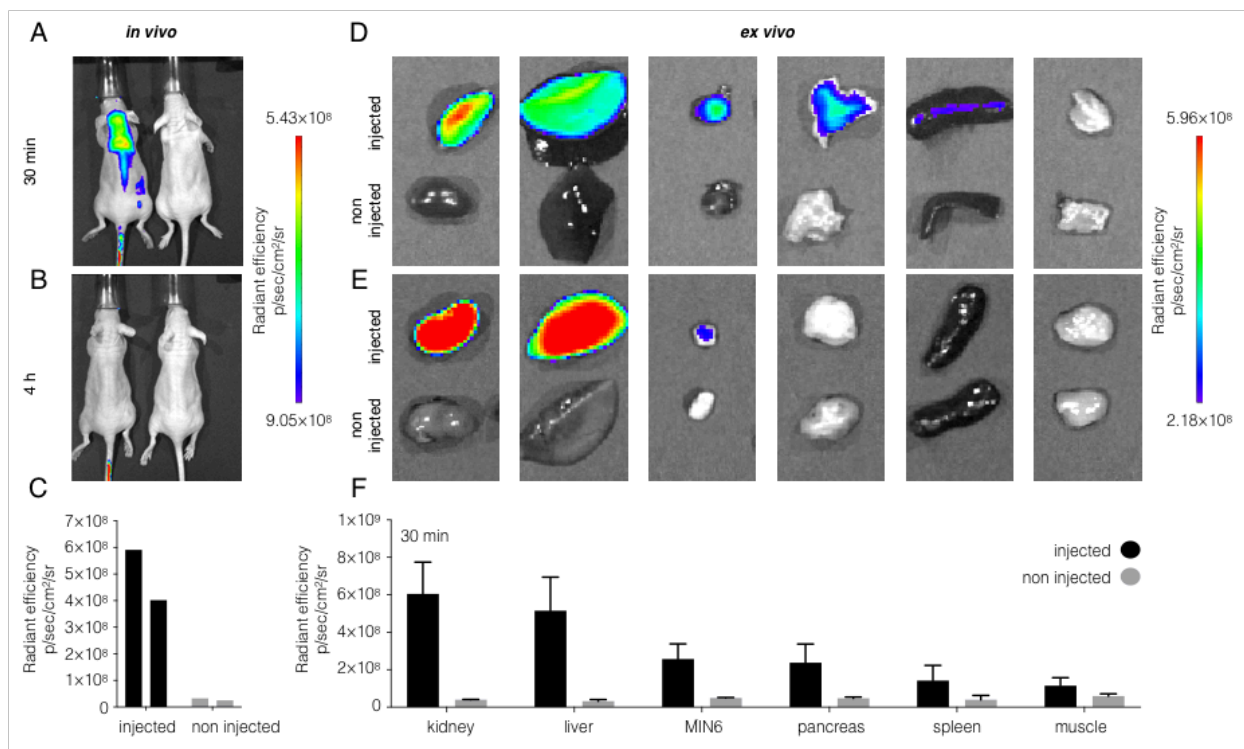

**Figure S3.** *In vivo* and *ex vivo* kinetics and biodistribution validation of E4<sub>x12</sub>-Cy7 using fluorescence IVIS imaging. (A) Representative *in vivo* fluorescent images of E4<sub>x12</sub>-Cy7 30 min post-i.v. injection, (B) 4 h post-i.v. injection and (C) quantifications (n = 3). (D) Corresponding *ex vivo* fluorescent images from left to right of kidney, liver, MIN6, pancreas, spleen and muscle tissues excised at 30 min and (E) 4 h post-i.v. injection of E4<sub>x12</sub>-Cy7. (F) Quantification of the *ex vivo* organs by drawing regions of interest (ROIs) around the tissue outlines using the white field images.

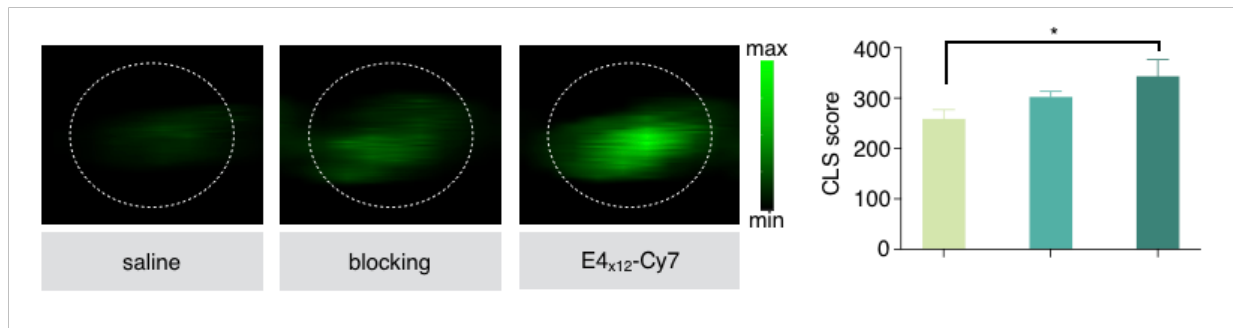

**Figure S4.** The ex vivo optoacoustic signal of kidneys between non injected, blocking and injected. From left to right are the MSOT images of the kidney from a mouse that was injected with saline, exendin-4 (151  $\mu\text{g}$ ) followed by the injection of E<sub>4x12</sub>-Cy7 (57  $\mu\text{g}$ , 20 mins time interval (blocking), and 57  $\mu\text{g}$  of E<sub>4x12</sub>-Cy7 (*left*) and the corresponding quantification (*right*). There is a statistically significant differences between mice that were injected with saline and E<sub>4x12</sub>-Cy7 ( $p^* = 0.0178$ ).
